# Supplementary material for: Patient-Reported Barriers to Healthcare Access Among Patients with Gastrointestinal Cancer: Insights from 45,000 Participants in the All of Us Research Program
Source: Research Square preprint supplement (doi:10.21203/rs.3.rs-6855375/v1), 2025-07-29

**
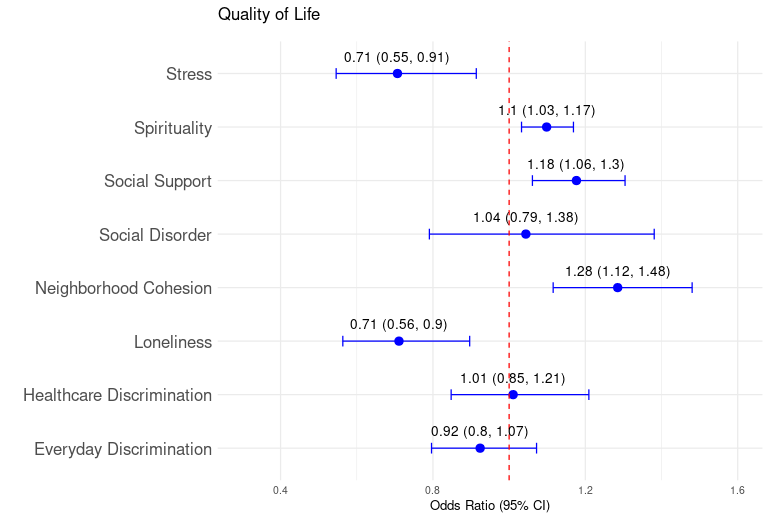
SUPPLEMENTAL FIGURES AND TABLES**

**Figure S1:** SNOMED codes for diagnoses used in cancer and comorbidity analysis

|  | Diagnosis | SNOMED Code(s) |
| --- | --- | --- |
| Cancer | Anus | 255084004, 126849006, 126850006, 449416001, 93676009 |
| Biliary | 126853008, 363415003, 371970002, 312104005 |
| Colon | 126838000, 721698005, 126841009, 363406005, 109838007, 363407001 |
| Esophageal | 126818001, 276804009, 126820003, 126819009, 187722004, 372138000, 187724003, 187723009, 372017008, 371984007 |
| Liver | 109841003 |
| Pancreas | 126859007, 717919005, 126864006, 363418001, 187791002, 126860002, 126862005, 372142002, 254611009, 254613007, 735735001 |
| Rectum | 126847008, 721700001, 93984006, 713573006 |
| Small Intestine | 448664009, 721670007, 126832004, 109837002, 95088009, 445737002, 363509000, 276818002, 94048009 |
| Stomach | 363349007, 109836006, 408647009, 187734007, 126824007, 372014001, 399967006, 721194008, 721634009 |
| Comorbidities | Anxiety | 197480006 |
| Congestive Heart Failure (CHF) | 194767001, 42343007, 426611007, 15781000119107, 194779001, 194781004, 5148006, 83105008 |
| Cirrhosis | 420054005, 1761006, 266468003, 19943007, 425413006 |
| Chronic Kidney Disease (CKD) | 709044004, 431855005, 431856006, 433144002, 431857002, 433146000 |
| Chronic Obstructive Pulmonary Disease (COPD) | 13645005 |
| Cerebrovascular Accident (CVA) | 230690007, 266257000 |
| Dementia | 26929004, 52448006, 191519005, 1591000119103, 416975007, 429998004 |
| Depression | 35489007 |
| Diabetes | 73211009, 111552007, 46635009, 313435000, 44054006, 313436004 |
| Hemiplegia | 50582007, 48601000119107, 442024001, 442155009, 441717007, 442668000, 609557004 |
| Myocardial Infarction (MI) | 57054005, 54329005, 70211005, 73795002, 76593002, 401314000, 401303003, 15713121000119105, 285981000119103, 194821006, 22298006, 16837681000119104, 1755008, 66189004, 194856005 |
| Peptic Ulcer Disease (PUD) | 13200003 |
| Peripheral Vascular Disease (PVD) | 840580004, 400047006, 34881000119105 |

**Figure S2:** Matched cohorts for binomial logistic regression by time from diagnosis to survey completion: A) 3 months, B) 6 months, C) 1 year


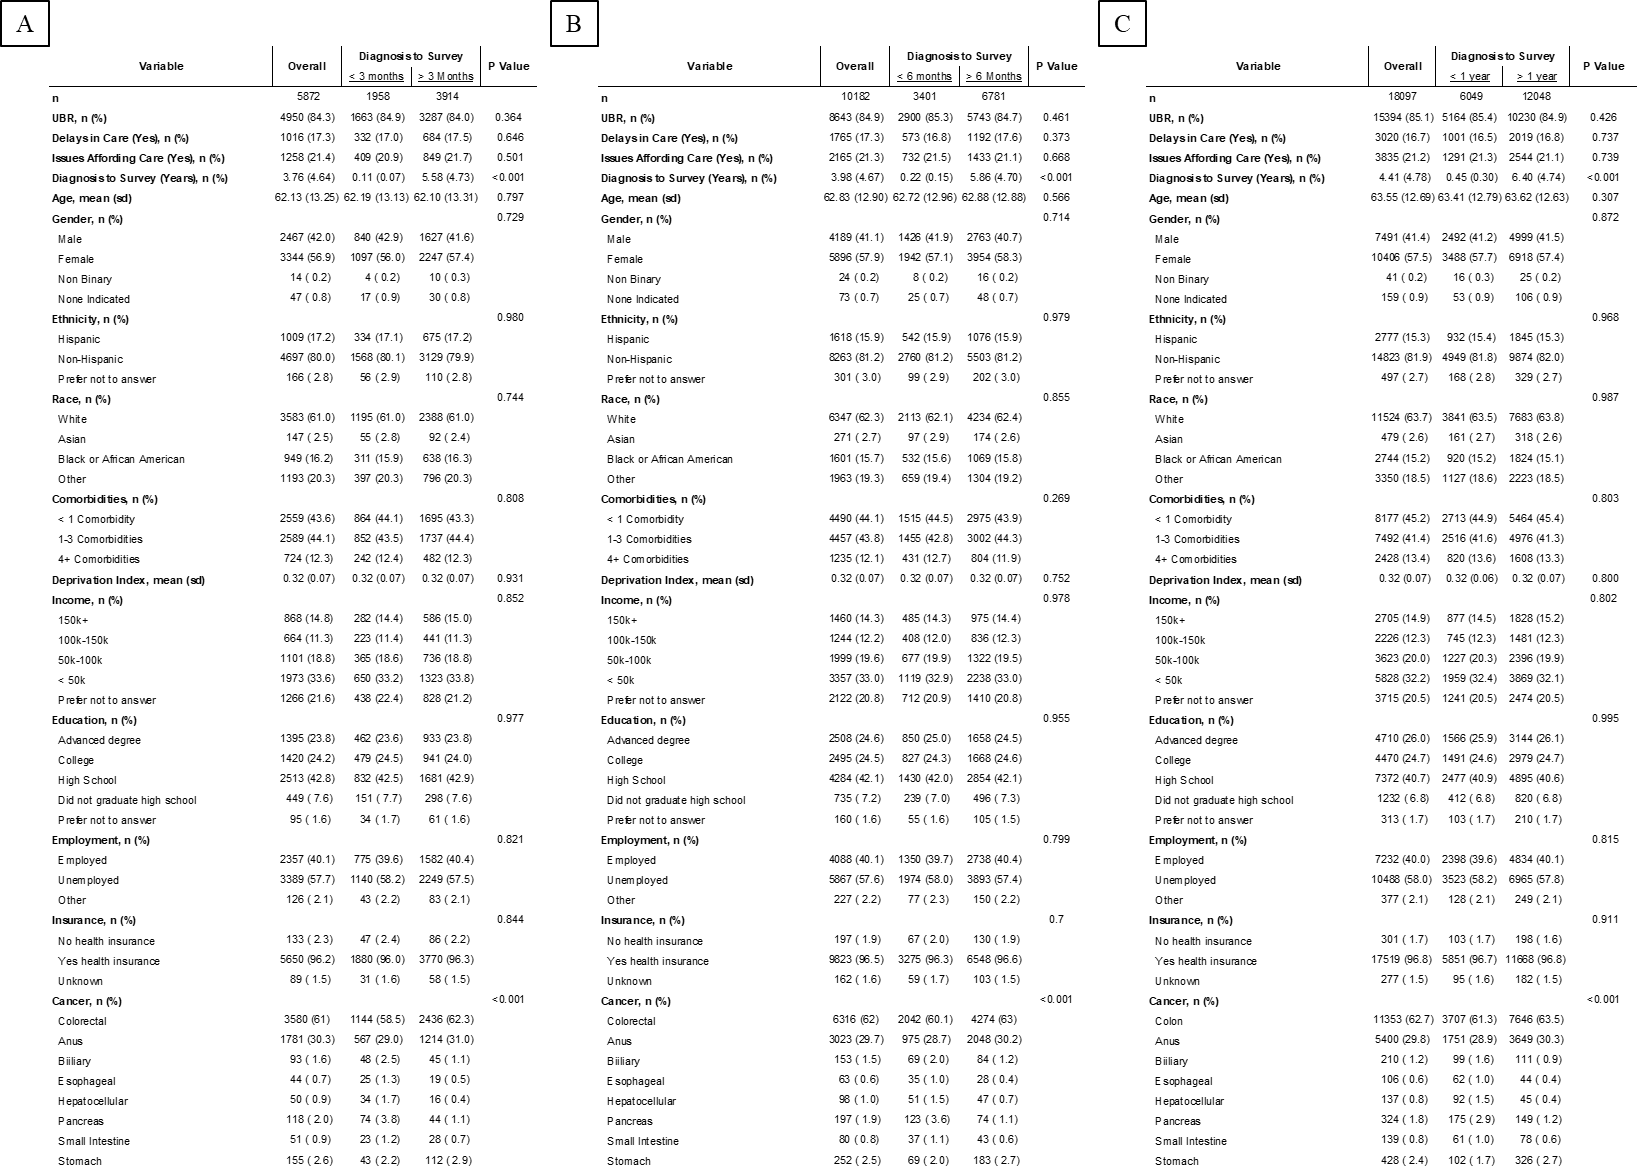


**Figure S3:** Number of reasons for A) delays in care or B) cost-related unmet needs for patients from diagnosis to survey completion


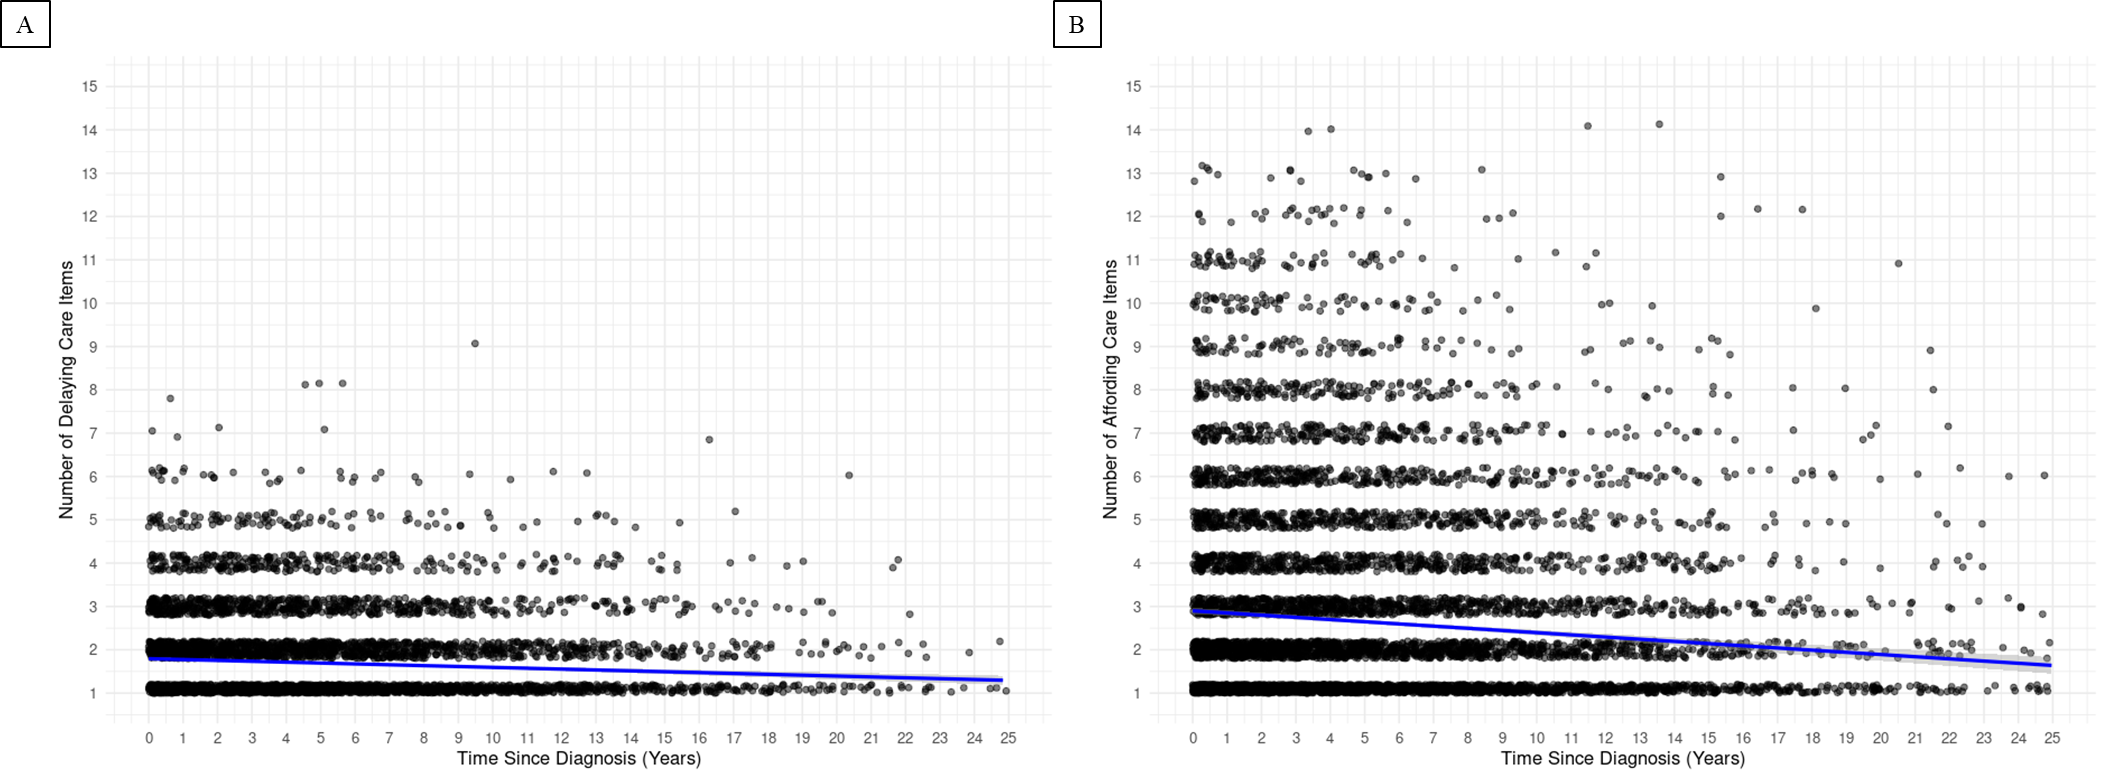


**Figure S4:** Sensitivity analysis for delays in care binomial logistic regression separated by time from diagnosis to survey completion: A) 3 months, B) 6 months, C) 1 year


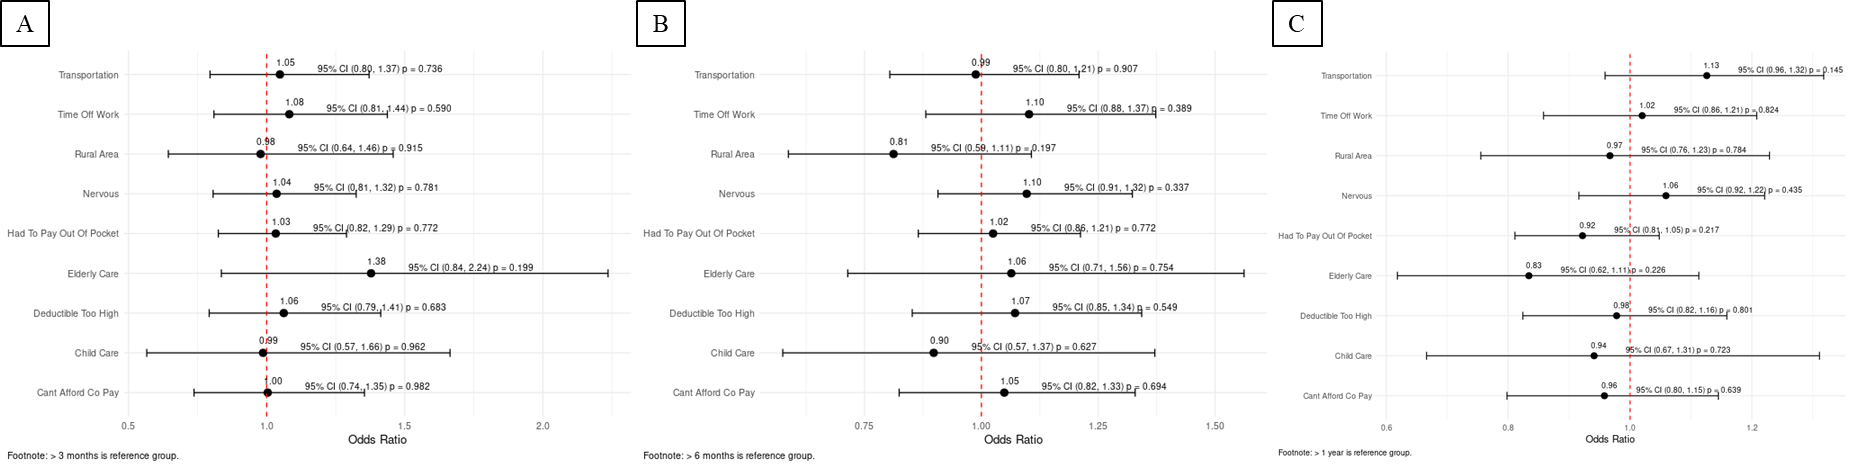


**Figure S5:** Sensitivity analysis for cost-related unmet needs binomial logistic regression separated by time from diagnosis to survey completion: A) 3 months, B) 6 months, C) 1 year


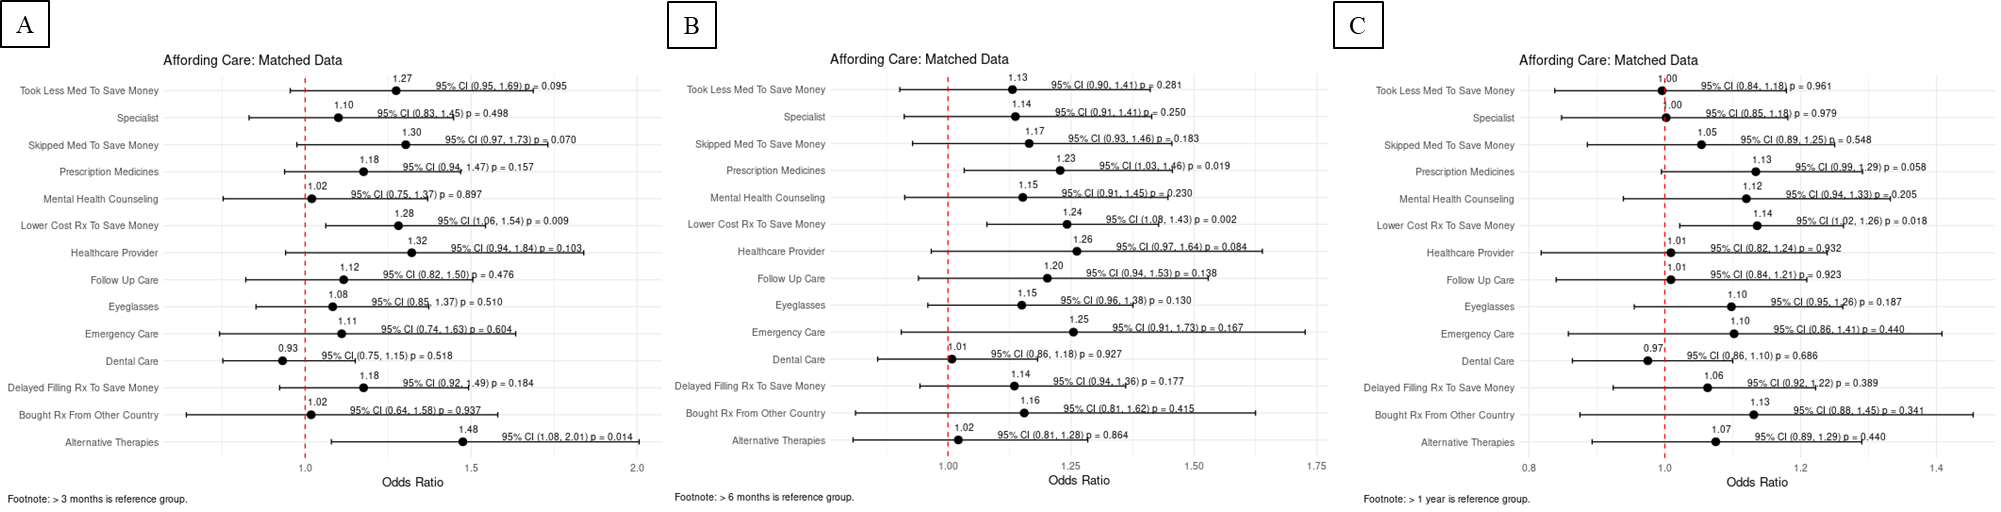

Supplement: Supplementary file 1 [file 8196bf8cc347a0e6b72d3ff5.docx]
